# Supplementary material for: Analysis of Serum MicroRNAs as Potential Biomarker in Coronary Bifurcation Lesion
Source: Dis Markers. 2015 Apr 27;2015:351015. doi: 10.1155/2015/351015 (PMC4426901; doi:10.1155/2015/351015)
Supplement: Supplementary file 1 — The list of miRNAs upregulated and downregulated between coronary bifurcation lesion and coronary nonbifurcation lesion. [file 351015.f1.xls]

## Sheet: Sheet1
downregulated miRNAs
Name	Fold change
hsa-miR-4305	4.1
hsa-miR-3689a-5p	5.6
hsa-miR-3680-5p	9.4
hsa-miR-5002-3p	6.9
hsa-miR-4726-5p	8.4
hsa-miR-4472	2.2
hsa-miR-5006-3p	3.2
hsa-miR-4451	2.4
hsa-miR-920	2.6
hsa-miR-1204	2.1
hsa-miR-7-2-3p	3
hsa-miR-3119	2.6
hsa-miR-3915	5.7
hsa-miR-4306	6.3
hsa-miR-4478	3.1
hsa-miR-5581-3p	2.7
hsa-miR-1255b-2-3p	12.5
hsa-miR-4725-5p	2.1
hsa-miR-424-5p	4.4
hsa-miR-516	5.3
hsa-miR-527	5.5
hsa-miR-4326	3.6
hsa-miR-3941	7.1
hsa-miR-506-5p	7.7
hsa-miR-4694-5p	5.7
hsa-miR-4503	3.9
hsa-miR-4445-3p	3.2
hsa-miR-490-3p	7.3
hsa-miR-20b-3p	2.5
hsa-let-7a-2-3p	3
hsa-miR-767-5p	2.6
hsv1-miR-H5-3p	3.1
hsa-miR-4307	6.6
hsa-miR-3673	9.8
hsa-miR-2964a-5p	15.6
hsa-miR-4468	2.7
hsa-miR-5684	18.1
hsa-miR-204-3p	5.4
kshv-miR-K12-1-3p	18.6
hsa-miR-4275	8.4
hsa-miR-3611	18.6
hsa-miR-4456	3.6
hsa-miR-4531	3.4
hsa-miR-4419b	6.8
hsa-miR-4521	2.3
hsa-miR-4712-3p	15.5
hsa-miR-4477a	6.4
hsa-miR-4447	2.3
hsa-miR-647	5.2
hsa-miR-761	14
hsa-miR-548e	3.2
hcmv-miR-UL22A-3p	2.6
hsv1-miR-H8-5p	2.6
hsa-miR-4273	3.4
hsa-miR-3649	2.9
hsa-miR-5007-3p	4.1
hsa-miR-548an	4.4
hsa-miR-576-5p	6.5
hsa-miR-708-5p	2.1
hsa-miR-1304-5p	4.1
hsa-miR-764	2.8
hsa-miR-4299	2.4
hsa-miR-421	8.3
hsa-miR-298	14.7
hsa-miR-4723-5p	3.4
hsa-miR-3160-5p	2.5
hsa-miR-1264	8.2
hsa-miR-500a-5p	2.5
hsa-miR-3926	3.3
hsa-miR-2681-5p	5.9
hsa-miR-15a-3p	2.8
hsa-miR-5197-5p	14.9
hsa-miR-4768-3p	4.2
hsa-miR-548	7.8
hsa-miR-589-5p	3.5
hcmv-miR-UL36-5p	4.2
hsa-miR-192-5p	3.3
hsa-miR-1972	20.4
hsa-miR-665	1.6
hsa-miR-1273e	3.2
hsa-miR-3688-5p	13.6
hsa-miR-5196-3p	2.2
hsa-miR-148b-5p	5.6
hsa-miR-635	3.1
hsa-miR-3126-5p	8.7
hsa-miR-3654	3.9
hsa-miR-630	4.5
hsa-miR-664b-3p	2.7
hsa-miR-4716-3p	3.3
hsa-miR-3156-3p	2.3
hsa-miR-498	2
hsa-miR-3940-5p	3.9
hsa-miR-4784	3.3
hsa-miR-3976	6.8
hsa-miR-1255b-5p	4.3
hsa-miR-890	4.8
hcmv-miR-US25	2.7
kshv-miR-K12-5-5p	2
hsa-miR-3123	3.8
hsa-miR-4254	5.8
hsa-miR-3938	2.6
hsa-miR-4795-5p	4.7
hsa-miR-4644	6.1
hsa-miR-1255a	4.2
hsa-miR-3911	2.1
hsa-miR-3686	4.6
kshv-miR-K12-5-3p	3.8
hsa-miR-3158-5p	8
hsa-miR-4780	4.3
hsa-miR-375	4.4
hsa-miR-2115-5p	3.8
hsa-miR-3935	7
hsa-miR-938	2.1
hsa-miR-5681b	2.2
hsa-miR-4777-5p	6.1
hsa-miR-4709-3p	3.3
hsa-miR-518	2.5
hsa-miR-22-5p	2.3
hsa-miR-125b-2-3p	12.2
hsa-miR-3146	24.7
hsa-miR-23c	2.1
hsa-miR-4300	2.2
hsa-miR-622	2.5
hsa-miR-2392	3.1
hsa-miR-1587	3.2
hsa-miR-4762-5p	16.6
hsa-miR-4800-5p	6.7
sv40-miR-S1-5p	6.4
hsa-miR-1272	2.9
hsa-miR-422a	2.4
hsa-miR-516b-5p	3.9
hsa-miR-4756-5p	3
hsa-miR-4682	3.9
hsa-miR-5002-5p	4.3
hsa-miR-4661-3p	10.7
hsa-miR-5006-5p	6.1
hsa-miR-3135a	2.6
hsa-miR-1285-5p	2.3
hsa-miR-214-3p	42.5
hsa-miR-891a	6.9
hsa-miR-574-3p	2.5
hsa-miR-520a-5p	2.4
hsa-miR-3171	3.9
hsa-miR-3126-3p	2.1
hsa-miR-620	3
hsa-miR-1246	10.9
hsa-miR-5698	3.4
hsa-miR-1273g-3p	21.6
hsa-miR-3145-5p	8.7
hsa-miR-4459	4.3
upregulated miRNAs
Name	Fold change
kshv-miR-K12-3-5p	0.4
hsa-miR-504	0.5
hsa-miR-3664-5p	0.4
hsa-miR-409-3p	0.1
hsa-miR-92b-3p	0.3
hsa-miR-5582-3p	0.3
hsa-miR-146b-5p	0.2
hsa-miR-2115-3p	0.3
hsa-miR-501-3p	0.2
hsa-miR-190b	0.3
hsa-miR-151a-3p	0.3
hsa-let-7d-3p	0.3
hsa-miR-382-5p	0.1
hsa-miR-3605-3p	0.3
hsa-miR-4667-3p	0.4
ebv-miR-BART17-5p	0.2
hsa-miR-155-5p	0.1
hsa-miR-33b-5p	0.2
hsa-miR-181d	0.2
hsa-miR-221-3p	0.4
hsa-miR-423-3p	0.2
hsa-miR-3183	0.4
hsa-miR-3920	0.3
hsa-miR-4654	0.3
hsa-miR-30e-3p	0.4
hsa-miR-4483	0.4
hsa-miR-30d	0.4
hsa-miR-4288	0.3
hsa-miR-99b-5p	0.4
hsa-miR-222	0.3
hsa-miR-937-3p	0.3
hsa-miR-671-3p	0.2
hsa-miR-1266	0.5
hsa-miR-5195-5p	0.5
hsa-miR-654-3p	0.1
hsa-miR-3184-3p	0.3
hsa-miR-4768-5p	0.3
hsa-miR-130b-5p	0.3
hsa-miR-877-5p	0.2
hsa-miR-103b	0.4
hsa-miR-584-5p	0.2
hsa-miR-339-5p	0.4
hsa-miR-432-5p	0.3
hsa-miR-146a-5p	0.3
hsa-miR-652-3p	0.2
hsa-miR-4297	0.4
hsa-miR-4500	0.4
